# Supplementary material for: Artificial Intelligence for Root Canal Segmentation on Radiographic Images: A Scoping Review
Source: Research Square preprint supplement (doi:10.21203/rs.3.rs-5952801/v1), 2025-02-11
Supplement: Supplementary file 2 [file db663396eada77e46eea79ae.docx]

Embase Classic+Embase <1947 to 2025 January 07>

Ovid MEDLINE(R) ALL <1946 to January 06, 2025>

Medline

1 artificial intelligence/ or exp machine learning/ 719326

2 (artificial intelligence or deep learning or machine learning or neural network*).tw,kf. 659062

3 neural networks, computer/ 117469

4 computer vision.tw,kf. 21952

5 or/1-4 1013148

6 tooth components/ or dental pulp cavity/ or exp "tooth root"/ or Endodontics/ 131800

7 exp "Root Canal Therapy"/ 33165

8 ((root or tooth or dental or endodontic or pulp) adj2 canal).tw,kf. 42066

9 (canal adj (segment* or classification* or shape*)).tw,kf. 873

10 (dental pulp or tooth root or endodontic anatomy).tw,kf. 25932

11 ((tooth or teeth) adj2 segment*).tw,kf. 912

12 or/6-11 184264

13 5 and 12 885

14 13 use medall 274

15 limit 14 to dt=20240305-20250108 89

Embase

16 exp *artificial intelligence/ 198023

17 exp *machine learning/ 275024

18 artificial intelligence/ or machine learning/ 313501

19 deep learning/ 96008

20 (artificial intelligence or deep learning or machine learning or neural network*).tw. 616874

21 artificial neural network/ 63247

22 neural network*.tw. 254980

23 *computer vision/ 1508

24 computer vision.tw. 19030

25 or/16-24 823493

26 "tooth root"/ or tooth pulp/ or dental pulp cavity/ or "tooth root canal"/ 70842

27 endodontic procedure/ or endodontics/ 35449

28 (("root" or tooth or dental or endodontic or pulp) adj2 canal).tw. 39385

29 (canal adj (segment* or classification* or shape*)).tw. 858

30 (dental pulp or "tooth root" or endodontic anatomy).tw. 23587

31 ((tooth or teeth) adj2 segment*).tw. 895

32 or/26-31 125571

33 25 and 32 578

34 33 use emczd 327

35 limit 34 to dc=20240304-20250108 115

36 15 or 35 204

37 remove duplicates from 36 134

**Scopus – January 8, 2025**

( ( ( TITLE-ABS-KEY ( canal W/2 ( segment* OR classification* OR shape* ) ) ) OR ( TITLE-ABS-KEY ( ( root OR tooth OR dental OR endodontic OR pulp ) W/2 canal ) ) OR ( TITLE-ABS-KEY ( ( "dental pulp" OR "tooth root" OR "endodontic anatomy" ) ) ) OR ( TITLE-ABS-KEY ( ( tooth OR teeth ) W/2 segment* ) ) ) AND ( ( TITLE-ABS-KEY ( "artificial intelligence" ) OR TITLE-ABS-KEY ( "machine learning" ) OR TITLE-ABS-KEY ( "deep learning" ) OR TITLE-ABS-KEY ( "neural network" ) OR TITLE-ABS-KEY ( "computer vision" ) ) ) ) AND ( ORIG-LOAD-DATE > 20240304 )

192 References

(688 References Total)

**Web of Science Search Strategy (v0.1)**

Database: Web of Science Core Collection

Entitlements:

WOS.IC: 1993 to 2025

WOS.CCR: 1985 to 2025

WOS.SCI: 1900 to 2025

WOS.AHCI: 1975 to 2025

WOS.BHCI: 2005 to 2025

WOS.BSCI: 2005 to 2025

WOS.ESCI: 2005 to 2025

WOS.ISTP: 1990 to 2025

WOS.SSCI: 1900 to 2025

WOS.ISSHP: 1990 to 2025

Searches:

1: TS=("artificial intelligence" or "machine learning" or "deep learning" or "neural network" or "computer vision" ) Date Run: Wed Jan 08 2025 13:45:40 GMT-0500 (Eastern Standard Time) Results: 1274770

2: TS=(canal NEAR/3 ( segment* OR classification* OR shape* )) Date Run: Wed Jan 08 2025 13:45:40 GMT-0500 (Eastern Standard Time) Results: 2496

3: TS=((( ( root OR tooth OR dental OR endodontic OR pulp ) NEAR/3 canal ))) Date Run: Wed Jan 08 2025 13:45:40 GMT-0500 (Eastern Standard Time) Results: 22706

4: ( ( ( "dental pulp" OR "tooth root" OR "endodontic anatomy" ) )) (Topic) Date Run: Wed Jan 08 2025 13:45:40 GMT-0500 (Eastern Standard Time) Results: 14527

5: #2 OR #3 OR #4 Date Run: Wed Jan 08 2025 13:45:40 GMT-0500 (Eastern Standard Time) Results: 37340

6: #1 AND #5 Timespan: 2024-03-04 to 2025-01-08 Date Run: Wed Jan 08 2025 13:45:41 GMT-0500 (Eastern Standard Time) Results: 60

(211 studies from inception)
